# Supplementary material for: Enhanced Survival of Plasmodium-Infected Mosquitoes during Starvation
Source: PubMed Central journal article supplement (PMC3393683; doi:10.1371/journal.pone.0040556), 2012-07-10
Supplement: pone.0040556.s006.pdf [file pone.0040556.s006.pdf]

Table S3. Fold-change values of representative probes targeting transcripts identified to be associated with carbohydrate catabolism; \*: Transcripts not considered in enrichment analysis due to fold-change and/or FDR not meeting selection criteria.

| Gene Name<br>(RefSeq mRNA ID)     | INTERPRO Annotation<br>[ID: Name]                                  | KEGG Pathway<br>[ID: Name]                                                                                                                                                                                   | Gene Ontology Biological Process<br>[ID: Name]                                                                                       | Fold change<br>10 dpi | 17 dpi |
|-----------------------------------|--------------------------------------------------------------------|--------------------------------------------------------------------------------------------------------------------------------------------------------------------------------------------------------------|--------------------------------------------------------------------------------------------------------------------------------------|-----------------------|--------|
| AgaP_AGAP004197<br>(XM_313091)    | IPR006113:<br>6-phosphogluconate<br>dehydrogenase, decarboxylating | aga00030:<br>Pentose phosphate<br>pathway, aga00480:<br>Glutathione metabolism                                                                                                                               | GO:0006007~glucose catabolic process,<br>GO:0006098~pentose-phosphate shunt                                                          | -1.649                | -1.53  |
| AgaP_AGAP000551<br>(XM_310532)    | IPR001017:<br>Dehydrogenase, E1 component                          |                                                                                                                                                                                                              | GO:0006007~glucose catabolic process,<br>GO:0006096~glycolysis                                                                       | -1.603                | -1.52  |
| AgaP_AGAP001903<br>(XM_321163)    | IPR001236:<br>Lactate/malate dehydrogenase                         | aga00020:<br>Citrate cycle (TCA cycle),<br>aga00620:<br>Pyruvate metabolism,<br>aga00630:<br>Glyoxylate and<br>dicarboxylate metabolism                                                                      | GO:0006007~glucose catabolic process,<br>GO:0006096~glycolysis                                                                       | -1.518                | -1.521 |
| AgaP_AGAP002914<br>(XM_311991)    | IPR019539:<br>Galactokinase galactose-binding<br>domain            | aga00052:<br>Galactose metabolism,<br>aga00520:<br>Amino sugar and<br>nucleotide sugar<br>metabolism,<br>aga00053:<br>Ascorbate and aldarate<br>metabolism,<br>aga00562:<br>Inositol phosphate<br>metabolism | GO:0005996~monosaccharide metabolic<br>process,<br>GO:0046835~carbohydrate<br>phosphorylation                                        | -1.52                 | -1.618 |
| AgaP_AGAP003636<br>(XM_313400)    | IPR007828:<br>Protein of unknown function<br>DUF706                | aga00053:<br>Ascorbate and aldarate<br>metabolism,<br>aga00562:<br>Inositol phosphate<br>metabolism                                                                                                          | GO:0016052~carbohydrate catabolic<br>process,<br>GO:0019310~inositol catabolic process                                               | -1.573                | 1.074* |
| AgaP_AGAP006660<br>(XM_316694)    | IPR001804:<br>Isocitrate/isopropylmalate<br>dehydrogenase          | aga00020:<br>Citrate cycle (TCA cycle),<br>aga00480:<br>Glutathione metabolism                                                                                                                               | GO:0006102~isocitrate metabolic<br>process,<br>GO:0055114~oxidation reduction,                                                       | -1.742                | -1.518 |
| AgaP_AGAP012261<br>(XM_320278)    | IPR001509:<br>NAD-dependent<br>epimerase/dehydratase               | aga00052:<br>Galactose metabolism,<br>aga00520:<br>Amino sugar and<br>nucleotide sugar<br>metabolism                                                                                                         | GO:0005996~monosaccharide metabolic<br>process,<br>GO:0006012~galactose metabolic<br>process,<br>GO:0019318~hexose metabolic process | -1.561                | -1.484 |
| AgaP_AGAP012583<br>(XM_001230540) | IPR006114:<br>6-phosphogluconate<br>dehydrogenase, C-terminal,     |                                                                                                                                                                                                              | GO:0006007~glucose catabolic process,<br>GO:0006098~pentose-phosphate shunt                                                          | -1.7                  | -1.644 |
| AgaP_AGAP007827<br>(XM_317672)    | IPR000941:<br>Enolase                                              | aga00010:<br>Glycolysis /<br>Gluconeogenesis,<br>aga03018:<br>RNA degradation                                                                                                                                | GO:0006007~glucose catabolic process,<br>GO:0006096~glycolysis                                                                       | -1.648                | -1.604 |
| AgaP_AGAP004451<br>(XM_313741)    | IPR001937:<br>Galactose-1-phosphate uridyl<br>transferase, class I | aga00052:<br>Galactose metabolism,<br>aga00520:<br>Amino sugar and<br>nucleotide sugar<br>metabolism                                                                                                         | GO:0005996~monosaccharide metabolic<br>process,<br>GO:0006012~galactose metabolic<br>process                                         | -1.298*               | -1.758 |
