# Supplementary material for: Enhanced Survival of Plasmodium-Infected Mosquitoes during Starvation
Source: PubMed Central journal article supplement (PMC3393683; doi:10.1371/journal.pone.0040556), 2012-07-10
Supplement: pone.0040556.s007.pdf [file pone.0040556.s007.pdf]

| Gene                                                                                                                 | ID                    | Forward                   | Reverse                  | product size(bp) |
|----------------------------------------------------------------------------------------------------------------------|-----------------------|---------------------------|--------------------------|------------------|
| Primers for qRT-PCR                                                                                                  |                       |                           |                          |                  |
| <i>P. berghei</i> 18s rRNA                                                                                           | 160646                | CCGACTAAGTGTGGATGAAAA     | TACTCGCCCAGAACCCAAAGA    | 119              |
| <i>A. gambiae</i> actin                                                                                              | AGAP000651            | GAAGGCTAACCGGAGAAGATG     | CGCCGGAGTCCAGCACGATA     | 134              |
| <i>A. gambiae</i> ILP1/7                                                                                             | AGAP010603/AGAP010605 | TACTGCTCGTCTGCTCTCC       | AGCAACATTCGGCCACCAC      | 355              |
| <i>A. gambiae</i> ILP2                                                                                               | AGAP010600            | AAAGCCACGCTACCTCTAC       | CACCTCCACCTTACTCGCTG     | 184              |
| <i>A. gambiae</i> ILP3/6                                                                                             | AGAP010602/AGAP010604 | GGTAAAGGTACTGTCTTCCTG     | TGTTGTCTTCCGCGTTCATC     | 128              |
| <i>A. gambiae</i> ILP4                                                                                               | AGAP010601            | AGCTGCCGAAGATACTTGCC      | CCATTCTACTAAAGTCCCAGTCC  | 142              |
| <i>A. gambiae</i> ILP5                                                                                               | AGAP003927            | CTGATACGCCATCTGTACTGG     | TACGCTTTTCCACCATCCCG     | 100              |
| <i>A. gambiae</i> INR                                                                                                | AGAP012424            | CCAACCTTACCAGGGACTGA      | GCATCGGGTAACAACATACG     | 180              |
| <i>A. gambiae</i> Enolase                                                                                            | AGAP007827            | GCCGCGTCCGAGTTCACAA       | GTCAACCAGGCGCTCGGGTC     | 80               |
| <i>A. gambiae</i> 6-phosphogluconate dehydrogenase                                                                   | AGAP004197            | GCGGACCCCAAGCAGTTCTT      | CGAATGATGCAACCGCCGCG     | 167              |
| AGAP003636                                                                                                           | AGAP003636            | CGGACAACCGACTGCACCAGC     | ACACACAAGCACGCTTTTTCACCC | 107              |
| AGAP006191                                                                                                           | AGAP006191            | ACCGACTGAATATGACGAGCAAACC | GATGGGTGCACAGTCCGGG      | 117              |
| AGAP005090                                                                                                           | AGAP005090            | ACTCCTCGGGAGCCAAAGCCT     | CGATCCATTCGGCGCTGGCA     | 125              |
| AGAP009049                                                                                                           | AGAP009049            | GGACGCTCTGGCCGTACACA      | ATCGCCGCTAACCGCATACGG    | 123              |
| Primers for dsRNA synthesis: a T7 promotor (taatacgaactataggaga) was added to 5' of both forward and reverse primers |                       |                           |                          |                  |
| <i>A. gambiae</i> ILP3/6                                                                                             | AGAP010602/AGAP010604 | CAACTTCGCCAAGCCGTCGGA     | TACCGCACGGCCGCAAAACA     | 257              |
| <i>A. gambiae</i> ILP4                                                                                               | AGAP010601            | GGACTGGGACTTTAGTGAGAATGG  | AGTGGGCACCACTCCTGGTG     | 253              |
| <i>A. gambiae</i> ILP5                                                                                               | AGAP003927            | TCGAGACGCAGCGCGATGG       | TCGCCGGTACTGGTTCAAGCG    | 258              |
| <i>A. gambiae</i> INR                                                                                                | AGAP012424            | CACACCCACCAGTTGTGCG       | TCCGAGCGGCTAAGTCGCGA     | 253              |
| GFP                                                                                                                  |                       | GCGACGTAACCGCCACAAGTT     | CGCGGGTCTTGTAGTTGCCGTC   | 270              |
